# Supplementary material for: Short-term serum and urinary changes in sex hormones of healthy pre-pubertal children after the consumption of commercially available whole milk powder: a randomized, two-level, controlled-intervention trial in China
Source: Royal Society of Chemistry journal article supplement (doi:10.1039/d2fo02321k), 2022-01-01
Supplement: d2fo02321k1.pdf [file d2fo02321k1.pdf]

Supplementary Table 1 The information of the testing whole milk powder

| Peculiarity      |                                                                                                                |
|------------------|----------------------------------------------------------------------------------------------------------------|
| General          | Uniform milky yellow color, with the unique smell of the milk powder, dry without agglomeration and impurities |
| Nutrient content | Water:2.8g/100g; Protein:18.2g/100g; Fat:18.6g/100g; Lactose: 3.4g/100g                                        |
| Sex hormone      | Estrone: ND, Estradiol: ND, Progesterone: 40.6 ug/kg, Testosterone: ND                                         |

ND means that the hormone was not detected.

Supplementary Table 2 The contents of macronutrients and energy for uniform breakfast on the day of the intervention

|                | Breakfast | Recommended intake | Breakfast (%) * |
|----------------|-----------|--------------------|-----------------|
| Energy (kcal)  | 244.20    | 1900.0             | 12.85           |
| Protein/g      | 8.16      | 45.0               | 18.13           |
| Fat/g          | 1.29      | 25.0               | 5.16            |
| Carbohydrate/g | 51.22     | 57.5               | 89.08           |

\* The percentage of breakfast calories or three major nutrients that are recommended for children in that age group.

Supplementary Table 3 The hormone levels in 3 whole milk powder and 1 skim milk powder

|                                | W1   | W2   | W3   | S  |
|--------------------------------|------|------|------|----|
| Estrone, ug/kg                 | ND   | ND   | ND   | ND |
| Estradiol, ug/kg               | ND   | ND   | ND   | ND |
| Progesterone, ug/kg            | 19.7 | 40.5 | 40.6 | ND |
| 17A-hydroxyprogesterone, ug/kg | ND   | ND   | ND   | ND |
| Testosterone, ug/kg            | ND   | ND   | ND   | ND |

W1 to W3 are the whole milk and S means skim milk.

ND means that the hormone was not detected.

The detection limit of estrone, progesterone, 17A-hydroxyprogesterone and testosterone was 5 ug/kg respectively, and the detection limit of estradiol was 2 ug/kg.

Supplementary Table 4 Serum progesterone levels before and after sugar or meal ingestion in three prepuberty children (nmol/L)

|               | Sugar |       |           | Meal |       |           |
|---------------|-------|-------|-----------|------|-------|-----------|
|               | 0h    | 3h    | variation | 0h   | 3h    | variation |
| Participant 1 | 2.30  | 1.15  | 1.15      | 2.05 | 0.85  | 1.20      |
| Participant 2 | 1.78  | 0.88  | 0.90      | 1.50 | 0.49  | 1.01      |
| Participant 3 | 1.95  | 0.60  | 1.35      | 2.61 | 0.75  | 1.86      |
| Paired-t      |       | 8.739 |           |      | 5.240 |           |
| <i>P</i>      |       | 0.013 |           |      | 0.035 |           |
